# Supplementary material for: C-reactive protein upregulates the whole blood expression of CD59 - an integrative analysis
Source: PLoS Comput Biol. 2017 Sep 18;13(9):e1005766. doi: 10.1371/journal.pcbi.1005766 (PMC5609773; doi:10.1371/journal.pcbi.1005766)
Supplement: S4 Table — Summary results from CRP-gene expression association, cis-eQTL and triplet model analyses, and p-values from the conditional correlation analysis for triplets with ΔAIC ≥ 10. (XLSX) [file pcbi.1005766.s006.xlsx]

## Sheet: Sheet 1
CHR	Gene	Beta.gene	CI.L.gene	CI.R.gene	P.gene	SNP	A1	Beta.eQTL	CI.L.eQTL	CI.R.eQTL	N.SNP	Equivalent.SNPs	P.eQTL	AIC.causal	AIC.colliding	AIC.independent	Best.model	DeltaAIC	P.(SNP,CRP)	P.(SNP,CRP|expr)
12	C3AR1	0.113928	0.059378	0.168478	0.00170265	rs2072448	A	-0.6173	-0.659398	-0.575202	491	rs2072449	8.36147e-88	2387.7	2364.68	2370.55	Colliding	23.0193	0.731401	2.27826e-06
9	HIATL1	0.0475252	0.0186585	0.0763918	0.0169685	rs10993177	G	0.5645	0.512114	0.616886	491	rs138924760,rs141639969,rs147817734,rs56062008	1.34063e-56	1366.99	1349.98	1355.13	Colliding	17.0157	0.445087	3.14808e-05
8	NRG1	0.191196	0.0948208	0.28757	0.00305081	rs2466077	T	0.9071	0.813181	1.00102	491		2.58731e-47	3317.5	3301.03	3304.8	Colliding	16.468	0.232252	1.67028e-05
1	SEMA4A	0.0545552	0.0264615	0.082649	0.00387255	rs7695	C	0.2374	0.207914	0.266886	491		1.5255e-37	2047.39	2031.69	2036.04	Colliding	15.7003	0.251537	3.54012e-05
9	PLGRKT	0.065375	0.0397813	0.0909687	7.88968e-05	rs2104175	C	0.1707	0.142656	0.198744	491		5.14121e-23	2043.17	2027.76	2030.55	Colliding	15.4026	0.177997	2.99217e-05
11	CD59	0.113429	0.0821042	0.144754	4.58822e-09	rs2272064	A	0.1891	0.150847	0.227353	491		2.44249e-15	2242.09	2226.71	2231.65	Colliding	15.3751	0.504636	7.05231e-05
19	FCGBP	-0.129422	-0.204722	-0.0541217	0.012052	rs4802064	T	0.6089	0.529865	0.687935	491		2.90488e-34	2893.83	2879.01	2882.33	Colliding	14.825	0.1054	3.41353e-05
11	IFITM3	0.174982	0.0661095	0.283854	0.0204828	rs7942247	A	0.9198	0.818521	1.02108	490		1.84812e-44	3351.03	3336.24	3341.23	Colliding	14.787	0.315329	0.000128953
11	FADS2	0.226913	0.10575	0.348075	0.00544583	rs61897793	A	2.071	1.99312	2.14888	491		1.59479e-161	2528.57	2542.93	2529.94	Causal	14.3545	0.000111013	0.271976
22	KREMEN1	0.162605	0.0933098	0.2319	0.000324859	rs134615	C	0.4104	0.332533	0.488267	491		2.5364e-17	3111.45	3101.36	3103.83	Colliding	10.0816	0.222529	0.00079193
12	CLEC4D	0.103314	0.0520212	0.154606	0.00253858	rs147976261	C	0.4833	0.390705	0.575895	491	rs61706479	1.30931e-17	2385.44	2376.16	2380.44	Colliding	9.2759
12	CLEC9A	-0.110137	-0.183332	-0.0369418	0.0317219	rs17807434	C	0.6381	0.529348	0.746852	491		5.64037e-21	2763.35	2754.5	2758.56	Colliding	8.84519
7	BLVRA	0.0476505	0.0207357	0.0745653	0.00932295	rs6957618	C	-0.1613	-0.190901	-0.131699	491		6.45189e-19	2125.25	2116.62	2121.1	Colliding	8.62832
1	FCER1G	0.0597202	0.0262486	0.0931917	0.00860724	rs2070901	T	0.2431	0.200291	0.285909	491		6.78345e-20	2144.44	2135.83	2138.28	Colliding	8.6165
1	CHI3L1	-0.201436	-0.305758	-0.0971142	0.00410212	rs10399931	T	-1.123	-1.22268	-1.02332	491		1.11908e-62	3099.78	3091.18	3096.56	Colliding	8.60416
12	MORN3	-0.10681	-0.162734	-0.0508867	0.00451914	rs6486789	C	0.3814	0.323542	0.439258	491		9.95961e-27	2762.45	2753.98	2757.01	Colliding	8.47228
17	C17orf62	0.0317125	0.0153981	0.0480268	0.00383357	rs9912066	C	-0.1106	-0.137175	-0.084025	491		5.14884e-11	1304.53	1296.13	1298.24	Colliding	8.3958
7	BLVRA	0.0476505	0.0207357	0.0745653	0.00932295	rs849162	A	-0.2111	-0.246554	-0.175646	491		3.61536e-22	1892.36	1884.01	1885.89	Colliding	8.35588
4	ANXA5	0.039119	0.0159393	0.0622987	0.0140296	rs7666178	T	-0.1331	-0.160237	-0.105963	491		4.32987e-15	1938.4	1930.47	1934.04	Colliding	7.9313
3	GRAMD1C	-0.1295	-0.188497	-0.0705028	0.000887659	rs9990079	A	-0.3457	-0.428969	-0.262431	491		2.17169e-11	2784.99	2777.14	2781.81	Colliding	7.84681
17	FN3KRP	-0.0517793	-0.0875071	-0.0160515	0.0399316	rs2280251	C	-0.4065	-0.428718	-0.384282	491		8.665e-112	1850.63	1842.89	1846.97	Colliding	7.73749
10	LIPA	0.0521154	0.0192746	0.0849562	0.0225588	rs1332327	T	0.3276	0.297512	0.357688	491	rs2246828,rs2250645	1.94456e-59	1988.06	1995.69	1991.82	Causal	7.62387
1	CNIH4	0.0716849	0.0450128	0.0983571	2.95597e-05	rs6672859	G	-0.1435	-0.180449	-0.106551	490		6.6676e-10	1977.55	1969.98	1974.25	Colliding	7.56989
17	LGALS9	0.0631078	0.027428	0.0987876	0.00941109	rs3751092	G	-0.3799	-0.415543	-0.344257	491		6.48744e-57	2030.95	2023.46	2025.65	Colliding	7.48659
16	HP	0.226056	0.13486	0.317252	0.000128898	rs8062041	T	-0.7997	-0.902345	-0.697055	491		9.44033e-34	3264	3256.51	3262.12	Colliding	7.48582
17	FN3KRP	-0.0517793	-0.0875071	-0.0160515	0.0399316	rs2243523	T	0.3343	0.304368	0.364232	491		1.09393e-59	2164.95	2157.51	2163.48	Colliding	7.44403
21	COL18A1	0.109447	0.0328315	0.186062	0.0436906	rs2236470	G	-0.9057	-0.976762	-0.834638	491		8.73193e-73	2683.18	2690.56	2685.98	Causal	7.38576
12	LTA4H	0.0492804	0.0148165	0.0837442	0.0434439	rs12319438	G	-0.3839	-0.442273	-0.325527	491	rs17025026,rs17025028,rs17025090,rs2268516,rs2300557,rs61054267,rs6538697,rs7296106,rs7959337,rs7981011	5.54913e-26	1863.38	1856.03	1860.86	Colliding	7.35032
10	HPS1	0.0733767	0.0413224	0.105431	0.000483022	rs701801	T	0.1689	0.128475	0.209325	491		1.98291e-11	2241.4	2248.68	2239.24	Independent	7.28095
5	CCDC152	-0.117419	-0.178433	-0.0564052	0.00422096	rs138885724	A	0.2867	0.214128	0.359272	491	rs150649046	1.63672e-10	2863.57	2856.32	2858.42	Colliding	7.25417
1	F5	0.102575	0.0620479	0.143103	9.18503e-05	rs9332538	T	-0.2902	-0.340225	-0.240175	491		5.74047e-21	2406.36	2399.11	2404.93	Colliding	7.2455
16	NPRL3	0.0989149	0.0404648	0.157365	0.0137477	rs78360966	T	0.511	0.400977	0.621023	491		7.77156e-14	2419.55	2412.5	2415.63	Colliding	7.05029
11	RAB6A	0.0219846	0.00874632	0.0352228	0.0159483	rs2886816	C	-0.0628	-0.0772027	-0.0483973	486		1.8654e-12	1476.47	1469.51	1471.44	Colliding	6.96725
8	PTK2B	0.0192275	0.00699545	0.0314595	0.0240066	rs28834970	C	0.08241	0.0670417	0.0977783	491		7.21031e-18	1211.79	1204.87	1208.48	Colliding	6.92042
19	ZNF626	-0.0794491	-0.132961	-0.0259376	0.0347975	rs274802	C	0.2914	0.23685	0.34595	491		5.55191e-18	2776.21	2769.34	2774.68	Colliding	6.87045
3	LRRFIP2	0.030752	0.0107784	0.0507255	0.0275372	rs9829683	A	-0.1341	-0.155768	-0.112432	491		9.82582e-24	1800.6	1793.81	1797.35	Colliding	6.78642
19	AC011484.1	0.257721	0.107638	0.407805	0.0121424	rs4803966	A	1.763	1.56633	1.95967	491	rs4803967	7.22598e-43	3382.26	3389.05	3381.04	Independent	6.78577
1	C1QB	0.206781	0.0815595	0.332002	0.0166606	rs12033074	G	0.6811	0.528222	0.833978	491		7.1454e-13	3561.49	3554.85	3557.5	Colliding	6.63575
16	MT1F	0.065994	0.0283014	0.103687	0.0101826	rs62038694	A	0.257	0.220017	0.293983	491		2.72896e-28	2389.33	2382.92	2384.65	Colliding	6.40608
22	TEF	-0.0648548	-0.09692	-0.0327896	0.00242845	rs2234052	G	0.3087	0.266061	0.351339	491	rs2234059	1.60739e-31	1921.8	1928.17	1927.43	Causal	6.36795
10	AGAP7	-0.139011	-0.212278	-0.0657432	0.00481553	rs12763717	G	-0.6357	-0.709775	-0.561625	491		2.44629e-44	2954.94	2948.58	2954.27	Colliding	6.362
17	ASGR2	0.0911662	0.0446018	0.137731	0.00356033	rs552653	T	0.3768	0.325656	0.427944	491		8.16063e-32	2543.07	2536.72	2541.75	Colliding	6.34863
7	TOMM7	-0.030986	-0.0531339	-0.00883818	0.0491776	rs10276099	A	-0.2101	-0.228758	-0.191442	491	rs2240726,rs2240728,rs2270103,rs2270105,rs4722188,rs981792	1.85753e-59	1700.01	1693.67	1697.81	Colliding	6.34497
17	ERN1	-0.0432502	-0.0735741	-0.0129262	0.0440798	rs107403	T	-0.2703	-0.310404	-0.230196	491	rs196939,rs196940,rs2088033	4.29103e-28	1932.58	1926.25	1931.12	Colliding	6.33024
4	DDX60L	0.109979	0.0662587	0.1537	0.000102814	rs4058185	C	0.1854	0.13139	0.23941	491		1.69321e-07	2623.63	2617.47	2621.95	Colliding	6.15877
17	WIPI1	0.0541221	0.0246555	0.0835887	0.00654363	rs78095701	C	-0.3043	-0.367253	-0.241347	491		1.23235e-14	1694.09	1687.93	1692.84	Colliding	6.15757
14	CDKL1	0.0952222	0.0439979	0.146446	0.00584581	rs11621764	C	-0.2899	-0.346748	-0.233052	491		1.11022e-16	2805.78	2799.76	2804.45	Colliding	6.01472
10	ACSL5	0.0295688	0.0127768	0.0463609	0.00966932	rs11195940	T	0.1102	0.0920192	0.128381	491	rs12255316	1.40558e-23	1640.34	1634.34	1638.54	Colliding	6.00361
4	LAP3	0.0832332	0.0299206	0.136546	0.025136	rs10019482	G	0.4063	0.351076	0.461524	491		6.31015e-31	2687.63	2681.65	2687.48	Colliding	5.97287
10	LIPA	0.0521154	0.0192746	0.0849562	0.0225588	rs1332328	T	0.3139	0.285483	0.342317	491		1.03896e-60	2069.5	2075.44	2073.86	Causal	5.93314
16	HSD3B7	0.118783	0.0701828	0.167384	0.000163346	rs881929	T	0.2144	0.149462	0.279338	490		7.38004e-08	2786.45	2780.52	2782.54	Colliding	5.92773
3	PLSCR1	0.14041	0.0883952	0.192424	2.75367e-05	rs1997604	C	-0.2695	-0.352972	-0.186028	491		1.25699e-06	2533.76	2527.89	2533.07	Colliding	5.87859
17	FAM20A	0.505693	0.404879	0.606508	7.48251e-17	rs67844728	T	-0.5377	-0.704478	-0.370922	491		1.48629e-06	3409.84	3403.97	3407.58	Colliding	5.86893
17	BAIAP2	-0.0825464	-0.125743	-0.0393497	0.00451717	rs4969349	A	0.1806	0.120473	0.240727	491		1.70373e-05	2494.75	2500.59	2492.01	Independent	5.84468
6	BTN2A1	0.0293078	0.0106274	0.0479882	0.0242764	rs2273193	C	0.1161	0.0906667	0.141533	491		1.28675e-13	1595.52	1601.32	1593.47	Independent	5.80744
22	TFIP11	-0.0479771	-0.0697423	-0.0262118	0.000837892	rs12628373	A	-0.3312	-0.353013	-0.309387	491	rs2097470	1.16288e-89	1186.11	1191.81	1189.77	Causal	5.69602
14	FLVCR2	0.0958035	0.0665127	0.125094	1.68495e-07	rs7146779	G	0.1577	0.121934	0.193466	491		1.45794e-12	2253.09	2247.46	2253.46	Colliding	5.6302
6	ETV7	0.297368	0.19069	0.404046	1.36821e-05	rs2234071	T	-0.8971	-1.00334	-0.790859	491		4.6874e-40	3416.04	3421.6	3420.48	Causal	5.55621
22	UBE2L3	0.0154849	0.00465283	0.0263171	0.0435122	rs4821104	G	0.07144	0.0551851	0.0876949	491		4.82281e-13	959.265	953.866	956.019	Colliding	5.39933
9	ALDH1A1	-0.0680978	-0.108731	-0.027465	0.0148044	rs6560326	G	-0.2436	-0.29578	-0.19142	491	rs7865274	5.71765e-14	2441.11	2435.72	2440.08	Colliding	5.39062
19	EMR1	0.0861965	0.0451545	0.127238	0.00156634	rs422389	G	0.3216	0.27189	0.37131	491		1.1835e-25	2377.86	2372.58	2378.51	Colliding	5.28361
10	TMEM180	0.0529607	0.0217657	0.0841557	0.0133644	rs3740409	A	0.229	0.180702	0.277298	491	rs3740416	1.31006e-14	2003.5	1998.25	2002.41	Colliding	5.2544
11	UCP2	0.0359666	0.0132355	0.0586976	0.0230699	rs653529	C	0.2035	0.18253	0.22447	491		1.86801e-49	1798.54	1793.32	1798.64	Colliding	5.22104
9	OLFM1	0.16069	0.0539406	0.26744	0.0317018	rs7858307	G	-0.8508	-0.962043	-0.739557	491		1.69041e-34	3406.34	3411.55	3411.94	Causal	5.21469
10	SIRT1	-0.0257037	-0.0434	-0.00800737	0.039458	rs10997855	G	0.1326	0.112791	0.152409	491		9.72703e-28	1601.25	1596.04	1599.7	Colliding	5.21213
15	SNX1	0.024707	0.0142016	0.0352123	0.000317614	rs12591947	C	0.07103	0.058007	0.084053	491		9.20801e-19	1030.85	1036.04	1036.55	Causal	5.19321
5	ZDHHC11B	-0.172644	-0.282619	-0.0626688	0.0242356	rs423546	A	0.4269	0.287495	0.566305	490		1.01657e-05	3413.39	3408.22	3408.55	Colliding	5.17568
22	TYMP	0.06917	0.0340408	0.104299	0.00333299	rs140522	T	-0.2182	-0.2596	-0.1768	491		5.01899e-17	2323.14	2317.98	2323.82	Colliding	5.1605
17	GAA	-0.0446567	-0.0765477	-0.0127657	0.0489801	rs2361702	A	0.2736	0.231376	0.315824	491		1.49378e-24	2023.75	2028.88	2025.39	Causal	5.13106
2	MARCO	0.168493	0.0751871	0.2618	0.00767798	rs12711915	C	-1.134	-1.2229	-1.0451	491		2.20374e-72	2898.57	2893.45	2898.95	Colliding	5.12919
19	PGLYRP1	0.136276	0.0779833	0.194568	0.000343381	rs2041993	A	-0.262	-0.342311	-0.181689	491		6.82326e-07	2867.74	2872.86	2871.07	Causal	5.11901
8	CCDC25	0.022606	0.00722396	0.0379881	0.0368651	rs10091671	G	0.1121	0.0967463	0.127454	491		9.69715e-31	1537.89	1543	1541.83	Causal	5.104
12	IKBIP	-0.067312	-0.102929	-0.031695	0.00500509	rs1055656	C	-0.1216	-0.162635	-0.0805649	491	rs7310804,rs7965771	1.40601e-05	2503.41	2508.48	2503.6	Causal	5.06976
1	GBP3	0.0950735	0.0429189	0.147228	0.00701206	rs10493821	T	-0.6325	-0.674911	-0.590089	491	rs12121223,rs17433780	2.57068e-91	2234.55	2229.48	2231.1	Colliding	5.06265
1	OR2W3	0.149721	0.0529526	0.246489	0.0266833	rs61855700	G	-0.5519	-0.70529	-0.39851	491		1.872e-08	3128.93	3123.88	3126.01	Colliding	5.04986
10	UROS	0.0348485	0.0151364	0.0545607	0.00942852	rs11244664	G	0.1513	0.131478	0.171122	491		2.44976e-35	1758.6	1753.63	1759.08	Colliding	4.96586
12	KRT1	0.232197	0.0930004	0.371394	0.0153436	rs11170234	A	1.037	0.896635	1.17736	485		2.00968e-31	3661.65	3656.69	3661.03	Colliding	4.96446
10	PPA1	0.0419365	0.0142623	0.0696108	0.0304196	rs7077538	G	0.2917	0.26977	0.31363	491		3.8048e-77	1821.78	1816.88	1818.88	Colliding	4.90547
10	CASP7	0.0607533	0.0304119	0.0910948	0.00272683	rs7918733	T	0.2117	0.178822	0.244578	491		5.53149e-25	2182.52	2177.62	2183.53	Colliding	4.89842
2	PLEK	0.0466481	0.0258111	0.0674851	0.000671627	rs7595717	T	0.1032	0.074879	0.131521	491		6.44401e-09	1763.08	1758.2	1763.25	Colliding	4.8785
17	THRA	-0.0418158	-0.0657511	-0.0178806	0.0104208	rs2314339	T	0.2055	0.166697	0.244303	491	rs883871	7.66069e-18	1624.19	1619.41	1624.95	Colliding	4.77561
3	GYG1	0.118658	0.086997	0.15032	1.27371e-09	rs6765487	T	-0.1298	-0.172421	-0.0871792	491		9.16345e-06	2253.74	2258.49	2259.54	Causal	4.7499
2	TNFAIP6	0.173942	0.103818	0.244066	0.000128249	rs289828	C	0.4881	0.405344	0.570856	491		8.87961e-22	3058.27	3053.54	3055.91	Colliding	4.73513
2	MARCO	0.168493	0.0751871	0.2618	0.00767798	rs72836143	T	-1.185	-1.30802	-1.06198	491		2.54051e-48	2800.08	2804.77	2805.28	Causal	4.69243
1	RNF187	0.048383	0.0235292	0.0732367	0.00377972	rs61827301	C	0.1737	0.124072	0.223328	491		3.23295e-08	1595.98	1591.32	1594.79	Colliding	4.66016
1	ADCK3	-0.041049	-0.0621804	-0.0199177	0.00386365	rs3768419	C	0.1856	0.166178	0.205022	491		8.15883e-47	1740.04	1735.44	1740.7	Colliding	4.6014
14	SERPINA1	0.0453798	0.0192824	0.0714771	0.0109115	rs3748314	T	-0.1183	-0.156304	-0.0802958	491	rs3748316	3.97246e-06	1926.41	1921.82	1924.88	Colliding	4.58814
19	ZNF835	-0.141155	-0.22693	-0.0553791	0.0170359	rs10412218	C	-0.4735	-0.576467	-0.370533	491		1.84186e-13	3147.35	3151.94	3146.51	Independent	4.58793
14	GCH1	0.0663645	0.0352561	0.097473	0.00127951	rs10139282	A	-0.2131	-0.272835	-0.153365	491	rs10498471	2.69555e-08	1856.82	1852.23	1857.49	Colliding	4.58741
1	MYBPH	-0.19969	-0.312755	-0.0866261	0.0094858	rs10399931	T	-1.136	-1.25622	-1.01578	491		7.05595e-48	3290.63	3286.12	3291.49	Colliding	4.51864
9	NSMF	-0.0450682	-0.0734232	-0.0167132	0.0223154	rs7390690	T	-0.1723	-0.202506	-0.142094	491		9.50356e-21	2194.87	2199.36	2199.81	Causal	4.49468
1	LGALS8	0.036694	0.0185502	0.0548379	0.00242845	rs630101	G	-0.09103	-0.118969	-0.0630915	491		9.47848e-07	1487.65	1483.17	1488.07	Colliding	4.47738
8	GRINA	0.109569	0.0771775	0.141961	5.26177e-08	rs56207135	C	-0.1272	-0.16834	-0.0860602	491		1.77824e-06	2330.62	2326.14	2329.45	Colliding	4.47459
4	KLHL5	0.0481995	0.0223452	0.0740537	0.00573706	rs35008079	G	0.1265	0.0970959	0.155904	491		4.77829e-12	2146.19	2141.74	2145.71	Colliding	4.45322
1	NECAP2	0.0186169	0.00660995	0.0306239	0.0263678	rs12031735	G	0.07904	0.0652206	0.0928594	491		9.56282e-21	1228.93	1233.36	1233.78	Causal	4.42858
11	IFITM1	0.0901128	0.0536666	0.126559	0.000135904	rs9666761	A	-0.1363	-0.182106	-0.0904936	491		1.69924e-05	2434.39	2429.97	2434.64	Colliding	4.4179
19	RDH13	-0.0641996	-0.105064	-0.0233351	0.0241191	rs1654455	G	-0.3924	-0.452158	-0.332642	491		1.60953e-25	2103.81	2108.21	2104.59	Causal	4.40281
4	FAM198B	0.0543803	0.0175298	0.0912307	0.0360084	rs10461268	T	0.438	0.378302	0.497698	491	rs10461269,rs11731973,rs35025809,rs4389619,rs4457000,rs9991405	5.37062e-33	1965.27	1960.88	1966.46	Colliding	4.38799
19	RDH13	-0.0641996	-0.105064	-0.0233351	0.0241191	rs3816043	G	-0.2942	-0.333776	-0.254624	491		1.30264e-31	2464.21	2468.57	2470.03	Causal	4.35942
2	PAX8	-0.352653	-0.577174	-0.128132	0.0241521	rs7576384	G	-2.321	-2.49884	-2.14316	491		2.84951e-73	3750.47	3754.78	3755.47	Causal	4.30852
14	PLD4	-0.0956188	-0.145298	-0.0459394	0.00422093	rs1036713	C	-0.1973	-0.254939	-0.139661	491		1.93406e-07	2829.76	2825.5	2829.54	Colliding	4.26095
7	GIGYF1	-0.0350077	-0.0521098	-0.0179056	0.00214505	rs4727462	G	0.1101	0.0794695	0.140731	491		1.16045e-08	1319.43	1315.31	1315.61	Colliding	4.12346
1	SELL	0.0490445	0.0193328	0.0787563	0.0166794	rs4987353	A	-0.198	-0.234033	-0.161967	491		4.83593e-19	2101.48	2097.35	2102.27	Colliding	4.12142
6	TMEM63B	0.0629167	0.030679	0.0951544	0.00369	rs4714761	T	0.3805	0.310541	0.450459	491		6.97013e-19	1685.07	1680.97	1683.35	Colliding	4.09663
9	TEK	-0.229813	-0.386822	-0.0728052	0.037687	rs590894	C	1.244	1.04132	1.44668	491		1.56944e-22	3687.28	3683.19	3685.9	Colliding	4.08943
9	RGS3	0.0419	0.0160957	0.0677043	0.0189014	rs12338788	A	-0.1795	-0.213924	-0.145076	491	rs7040635,rs7049221,rs72760096,rs72761999,rs72763841,rs7854524,rs7856689,rs7864816,rs883025,rs9785299	4.81432e-17	1880.98	1876.92	1879.05	Colliding	4.06312
1	ARHGEF19	-0.0584576	-0.0889651	-0.0279501	0.00439711	rs221061	G	0.2883	0.256121	0.320479	491	rs221063	7.61219e-43	1948.3	1952.36	1953.7	Causal	4.05875
9	NPDC1	0.0944018	0.0307769	0.158027	0.0349324	rs7390981	G	-0.615	-0.75068	-0.47932	491		4.30989e-13	2472.74	2468.71	2470.68	Colliding	4.02522
1	S100A12	0.145584	0.0877033	0.203464	0.000102814	rs60752752	G	0.6259	0.525017	0.726783	491		2.03665e-24	2391.14	2387.12	2392.73	Colliding	4.02216
13	PHF11	0.0434859	0.0127933	0.0741786	0.0457325	rs3186013	G	-0.1166	-0.152938	-0.0802617	491		1.22642e-06	2327.96	2323.98	2320.4	Independent	3.97874
19	YIF1B	0.0317411	0.0125891	0.0508932	0.0161981	rs112827305	T	0.1333	0.107509	0.159091	488		4.44089e-16	1573.19	1577.15	1578	Causal	3.95344
14	GALC	0.0355094	0.0160642	0.0549546	0.00691587	rs76674403	C	-0.1221	-0.150999	-0.0932011	491		9.15656e-12	1571.03	1567.1	1570.97	Colliding	3.92453
9	SURF6	-0.0639808	-0.0906484	-0.0373132	0.000224375	rs3739890	A	0.1149	0.081831	0.147969	491		1.23798e-07	2138.47	2142.36	2139.15	Causal	3.88706
10	IFIT5	0.0790681	0.0310551	0.127081	0.0169364	rs304493	G	-0.2466	-0.313636	-0.179564	491	rs304498	5.95197e-09	2539.11	2535.29	2538.97	Colliding	3.8184
22	DESI1	0.031133	0.0165528	0.0457131	0.00126967	rs28384792	C	-0.0757	-0.0922961	-0.0591039	491		3.28626e-14	1585.58	1581.77	1587.43	Colliding	3.81442
1	AGTRAP	0.0431746	0.0227575	0.0635917	0.0014291	rs17875987	G	-0.1419	-0.181144	-0.102656	491		1.9129e-08	1424.83	1428.62	1428.2	Causal	3.79288
2	ATOH8	-0.250714	-0.410154	-0.0912735	0.0239618	rs12151621	A	1.687	1.50341	1.87059	491	rs7577293,rs7603438	4.39164e-44	3636.54	3640.33	3641.97	Causal	3.7857
5	PFDN1	0.0231539	0.00956118	0.0367466	0.0130005	rs13167094	G	-0.05605	-0.0733148	-0.0387852	489		2.95413e-07	1401.86	1398.08	1402.45	Colliding	3.78006
11	SMCO4	0.0588739	0.0262677	0.09148	0.00767835	rs11606253	A	0.3491	0.307354	0.390846	491	rs11606261,rs11606262,rs34028949,rs34819559,rs35368196,rs35901746,rs3794008	9.00129e-39	1926.22	1922.44	1919.73	Independent	3.77541
19	FCGBP	-0.129422	-0.204722	-0.0541217	0.012052	rs4803308	T	-0.5807	-0.652872	-0.508528	491		8.16031e-37	2982.53	2978.75	2984.63	Colliding	3.7734	0.800575	0.0492246
22	ASPHD2	0.0551866	0.0272568	0.0831165	0.0031899	rs5761561	G	-0.09525	-0.127206	-0.0632941	491		1.73994e-05	2273.85	2270.14	2274.65	Colliding	3.7061
3	CCR1	0.0671685	0.0243091	0.110028	0.0244018	rs1491961	T	0.3076	0.259903	0.355297	491		1.20109e-24	2463.37	2459.68	2464.2	Colliding	3.68411
5	RPS23	-0.0315659	-0.0486892	-0.0144426	0.00636305	rs6880209	T	-0.08754	-0.108187	-0.0668932	491		4.90363e-12	1654.66	1658.34	1658.76	Causal	3.68091
17	GAA	-0.0446567	-0.0765477	-0.0127657	0.0489801	rs12450199	C	-0.2658	-0.297898	-0.233702	491		2.95139e-37	2148.27	2151.9	2152.99	Causal	3.62683
16	BAIAP3	-0.102304	-0.168425	-0.0361821	0.0266833	rs8063	A	0.4719	0.397009	0.546791	491		5.6347e-24	2924.77	2921.15	2926.59	Colliding	3.62381
18	C18orf8	0.0219939	0.00721125	0.0367766	0.0343584	rs4800487	G	0.05394	0.0369759	0.0709041	491		5.73077e-07	1612.39	1615.97	1614.64	Causal	3.57415
19	ZFP14	-0.0310776	-0.0532749	-0.00888022	0.049017	rs12462725	C	-0.1826	-0.210825	-0.154375	491		2.85422e-25	1698.49	1702.05	1703.32	Causal	3.5645
3	UBA7	0.0260432	0.00759013	0.0444963	0.0469443	rs2271961	C	-0.1239	-0.143204	-0.104596	491		2.55037e-26	1732.86	1736.42	1738.26	Causal	3.56422
19	NUCB1	0.069499	0.0484796	0.0905183	1.25854e-07	rs9941449	T	-0.2178	-0.254952	-0.180648	491		4.21322e-21	1433.83	1430.27	1435.12	Colliding	3.56373
16	NOMO3	0.142407	0.0420725	0.242741	0.0452897	rs62030355	T	-0.9312	-1.20623	-0.656167	491		2.32312e-07	2945.86	2949.4	2947.36	Causal	3.53807
11	LDHA	0.0605871	0.0448959	0.0762783	5.59848e-10	rs7128549	G	0.07877	0.0581356	0.0994044	491		1.84557e-09	1555.46	1551.92	1555.82	Colliding	3.53733
6	PSMB8	0.0443496	0.0236352	0.0650641	0.00122255	rs2071467	T	0.1997	0.144789	0.254611	491		8.2258e-08	1255.05	1251.52	1256.53	Colliding	3.53036
6	FLOT1	0.0452902	0.0207768	0.0698036	0.00622024	rs4711230	C	-0.1147	-0.145755	-0.0836449	491	rs4713368	7.21567e-09	2009.86	2006.33	2010.96	Colliding	3.52827
7	TTC26	0.110579	0.0479536	0.173205	0.0095011	rs12667209	T	0.3153	0.215819	0.414781	491	rs13233014,rs35466570,rs62485931	1.13349e-06	2781.85	2778.33	2782.68	Colliding	3.51754
19	PNMAL1	0.347979	0.12061	0.575349	0.0286056	rs12151337	T	2.609	2.39214	2.82586	491	rs12978825,rs3826853,rs3826854,rs8103767,rs8107747,rs8108681	8.26608e-66	3717.46	3720.94	3721.68	Causal	3.48822
3	ATG7	0.0337692	0.017981	0.0495573	0.00124036	rs4684063	T	-0.08768	-0.112528	-0.0628319	489		5.39862e-08	1324.41	1320.94	1325.56	Colliding	3.47142
22	CYB5R3	0.0476165	0.0256039	0.069629	0.00105768	rs736015	C	-0.1301	-0.166172	-0.0940282	491		5.10521e-08	1616.53	1619.96	1622	Causal	3.43373
1	IL10	0.141045	0.0458282	0.236263	0.0352496	rs1518111	T	-0.5639	-0.706436	-0.421364	491		2.80278e-10	3315.87	3312.44	3316.34	Colliding	3.42983
12	CHPT1	0.128138	0.0658203	0.190456	0.00204511	rs2559856	A	-0.3009	-0.374034	-0.227766	491		5.04092e-11	2986.5	2983.09	2988.65	Colliding	3.40769
5	NDST1	-0.044573	-0.0764367	-0.0127093	0.0491776	rs12519827	A	-0.5238	-0.575808	-0.471792	491	rs73272643,rs73272649	2.65498e-53	1576.39	1579.78	1582.37	Causal	3.38771
6	ARG1	0.190908	0.102958	0.278858	0.00100922	rs2246012	C	-0.9669	-1.0852	-0.848605	491		3.57467e-38	3012.56	3009.19	3013.01	Colliding	3.36765
10	PPA1	0.0419365	0.0142623	0.0696108	0.0304196	rs7084009	T	0.1681	0.132401	0.203799	491		3.84137e-14	2027.41	2024.05	2029.21	Colliding	3.3635
11	COPB1	0.0187276	0.00534163	0.0321136	0.0491776	rs2597208	A	-0.07174	-0.0875369	-0.0559431	491		1.56986e-13	1423.61	1420.27	1425.48	Colliding	3.34277
8	ZNF696	-0.0501293	-0.0831979	-0.0170607	0.0304094	rs2235115	C	-0.1264	-0.165893	-0.086907	491		1.77669e-06	2419.79	2416.5	2419.06	Colliding	3.29178
16	ROGDI	0.0533031	0.02015	0.0864563	0.0204458	rs2290562	A	0.3332	0.297572	0.368828	491		6.92053e-45	2050.23	2053.51	2052.01	Causal	3.28499
19	FCHO1	-0.0393322	-0.0581166	-0.0205478	0.00163376	rs13345379	G	0.08916	0.0665649	0.111755	491		9.45513e-10	1836.49	1833.22	1838.29	Colliding	3.27817
19	ZFP82	-0.0481824	-0.0788954	-0.0174695	0.0242764	rs2967511	A	-0.2538	-0.29123	-0.21637	491		1.26203e-27	1987.77	1991.04	1992.88	Causal	3.27243
2	SLC8A1	0.0614291	0.0341767	0.0886816	0.000606604	rs7597373	A	-0.1275	-0.159546	-0.0954539	491		9.17686e-10	2181.85	2178.58	2184.07	Colliding	3.27145
12	SCARB1	-0.0506922	-0.0822149	-0.0191695	0.0204205	rs7954697	C	0.1923	0.15671	0.22789	491		6.60895e-18	2340.07	2336.8	2340.1	Colliding	3.26757
7	UPP1	0.0986802	0.0748055	0.122555	2.5863e-11	rs9639991	T	0.09198	0.0637322	0.120228	491		8.68334e-07	2135.38	2138.64	2140.58	Causal	3.26138
10	CASP7	0.0607533	0.0304119	0.0910948	0.00272683	rs3814231	T	-0.2281	-0.262098	-0.194102	491		7.57166e-27	2123.96	2120.7	2126.34	Colliding	3.25995
3	PCYT1A	0.028103	0.0131725	0.0430334	0.00522838	rs12637288	A	-0.05399	-0.07116	-0.03682	491		3.73063e-06	1628.35	1625.1	1627.26	Colliding	3.2512
17	PRR11	0.0695684	0.0338427	0.105294	0.00377797	rs35678871	A	0.2548	0.18111	0.32849	491		4.12133e-08	2021.06	2017.82	2023.24	Colliding	3.24269
1	EFCAB2	0.108829	0.0555767	0.162082	0.00218696	rs61844237	G	0.3469	0.284637	0.409163	490		3.28444e-19	2758.25	2755.04	2760.87	Colliding	3.21348
1	SCYL3	0.0216322	0.00688692	0.0363774	0.0371551	rs2205845	G	0.06312	0.046758	0.079482	491		6.82252e-10	1608.71	1605.49	1610.4	Colliding	3.21324
9	PPP2R4	0.0272977	0.0132279	0.0413675	0.00390451	rs10819469	G	-0.102	-0.118058	-0.0859425	490		2.13066e-25	1359.6	1356.4	1362.16	Colliding	3.19899
1	DISC1	0.0692703	0.0338311	0.10471	0.00364318	rs1094657	C	-0.3057	-0.341111	-0.270289	491	rs1094658	2.39308e-41	2260.51	2257.33	2260.83	Colliding	3.18347
11	ADM	0.167362	0.115878	0.218845	2.04988e-07	rs2083716	A	-0.2287	-0.289744	-0.167656	491		3.69496e-09	2850.2	2853.38	2855.55	Causal	3.18229
12	BTBD11	-0.054905	-0.0917464	-0.0180636	0.0339407	rs1991310	G	0.2397	0.201567	0.277833	491		7.90502e-24	2433.69	2430.54	2435.72	Colliding	3.15239
12	CD9	0.0954737	0.0345838	0.156364	0.0243323	rs10849416	C	-0.3517	-0.417601	-0.285799	491		2.94564e-18	2945.47	2948.62	2950.98	Causal	3.14826
9	CRAT	0.0468533	0.0153102	0.0783964	0.0347593	rs2297111	G	-0.2495	-0.284504	-0.214496	491		7.15299e-31	2129.01	2125.86	2131.54	Colliding	3.14195
9	TOR1A	0.0243548	0.00896186	0.0397478	0.0230699	rs2296786	C	-0.07347	-0.0906434	-0.0562966	491		5.67224e-12	1613.2	1610.09	1614.47	Colliding	3.11361
14	WARS	0.075968	0.0376617	0.114274	0.00306102	rs3783347	T	0.2833	0.231887	0.334713	491	rs941928	3.205e-19	2250.7	2247.59	2252.73	Colliding	3.10904
14	MARK3	0.0534605	0.0294113	0.0775097	0.000737794	rs58153827	A	0.09503	0.0618471	0.128213	491	rs6575979,rs8013228	2.48458e-05	1921.09	1917.99	1923.41	Colliding	3.10172
9	NPDC1	0.0944018	0.0307769	0.158027	0.0349324	rs28705707	A	0.359	0.289949	0.428051	491		1.11022e-16	3017.03	3020.13	3022.76	Causal	3.10121
19	LILRA6	0.0796359	0.0530766	0.106195	2.48874e-06	rs255772	G	-0.1623	-0.212316	-0.112284	491		1.60709e-06	1737.06	1740.16	1741.69	Causal	3.09625
16	GDE1	0.055652	0.0352853	0.0760186	2.09558e-05	rs2269433	G	0.1278	0.0953371	0.160263	491		4.46859e-10	1572.1	1575.19	1578.08	Causal	3.09577
3	ABCC5	-0.0560851	-0.0889804	-0.0231897	0.0129072	rs7636910	C	-0.2704	-0.303879	-0.236921	491		2.80934e-36	2164.35	2161.27	2166.62	Colliding	3.07936
1	ACP6	-0.0483173	-0.0829735	-0.0136611	0.0499243	rs2153463	T	-0.2448	-0.286449	-0.203151	491		1.23607e-21	2218.31	2221.35	2223.83	Causal	3.04527
10	HHEX	0.0414024	0.0155028	0.067302	0.0213657	rs36082564	A	-0.1227	-0.161258	-0.0841418	491		9.02764e-07	1873.97	1870.93	1874.18	Colliding	3.04004
20	MAPRE1	0.0278575	0.0165461	0.0391688	0.000145988	rs6119954	A	0.06834	0.0493731	0.0873069	491		2.27309e-08	953.696	956.736	958.521	Causal	3.03917
3	AZI2	0.025818	0.00838165	0.0432543	0.0353024	rs13095675	C	0.07457	0.0555963	0.0935437	491		7.30507e-11	1774.62	1777.64	1779.15	Causal	3.01676
12	LTA4H	0.0492804	0.0148165	0.0837442	0.0434439	rs61938772	T	0.1802	0.121551	0.238849	477		6.12355e-06	1979.04	1976.03	1980.26	Colliding	3.00934
2	VAMP5	0.088948	0.0527036	0.125192	0.000154729	rs28564788	T	-0.2502	-0.320637	-0.179763	491		5.06996e-08	1976.7	1979.71	1981.38	Causal	3.00553
6	ZDHHC14	-0.0506791	-0.08526	-0.0160982	0.0373761	rs35795521	T	-0.1273	-0.169914	-0.0846863	491	rs9346769,rs9364499,rs9457464,rs9457470,rs9457471	1.26237e-05	2303.32	2306.3	2307.09	Causal	2.97383
22	KIAA0930	0.0345762	0.0163565	0.052796	0.00481553	rs4823451	G	0.09166	0.0689425	0.114378	491		2.07005e-10	1696.11	1693.17	1693.16	Independent	2.94258
20	EDEM2	0.0242621	0.0100475	0.0384767	0.0128029	rs13040631	C	-0.07382	-0.0925155	-0.0551245	478		1.30694e-10	1283.63	1280.7	1284.81	Colliding	2.93223
6	RPL10A	-0.0257704	-0.0429737	-0.00856705	0.0328022	rs45500193	T	-0.1945	-0.239128	-0.149872	491		1.21148e-12	1038.43	1035.51	1039.18	Colliding	2.9185
1	TPM3	0.0300891	0.0174434	0.0427349	0.000259048	rs1051370	G	0.06485	0.0500326	0.0796674	491		1.7556e-12	1393.56	1390.66	1394.35	Colliding	2.89556
10	LHPP	0.0466027	0.0177156	0.0754898	0.01989	rs11245108	A	-0.1414	-0.174213	-0.108587	491		1.055e-11	2192.86	2195.75	2198.25	Causal	2.88229
3	CACNA2D3	-0.0855689	-0.122016	-0.0491218	0.000322987	rs1318596	C	0.1576	0.106745	0.208455	491		7.62989e-06	2318.13	2320.98	2323.56	Causal	2.84343
14	GPR65	0.0452116	0.0140298	0.0763933	0.0398805	rs6574976	T	-0.1386	-0.175787	-0.101413	491		3.19161e-09	2263.72	2260.88	2266.15	Colliding	2.84205
17	CD300LB	-0.0487469	-0.0764733	-0.0210204	0.00978205	rs6416844	A	-0.1018	-0.133755	-0.0698454	490		1.83701e-06	2235.48	2238.32	2240.13	Causal	2.84103
20	GNAS	0.0551553	0.0254982	0.0848124	0.00583754	rs7121	T	-0.1028	-0.138385	-0.0672146	491		3.05558e-05	2290.89	2288.06	2292.13	Colliding	2.82642
3	PPM1M	0.0290042	0.0137174	0.044291	0.00481553	rs2276834	A	0.07847	0.0609451	0.0959949	491		8.89289e-14	1603.32	1600.52	1606.36	Colliding	2.79165
17	ATP1B2	0.212938	0.0985147	0.327361	0.00580704	rs2909415	A	0.9662	0.781986	1.15041	482		1.11022e-16	3190.79	3188.02	3192.85	Colliding	2.76679
12	DRAM1	0.0643581	0.0406017	0.0881144	2.56015e-05	rs7138541	G	0.1126	0.084142	0.141058	491	rs7307726	2.6334e-10	2068.04	2070.8	2067.54	Independent	2.75828
10	FAM160B1	0.0390646	0.0157895	0.0623397	0.0146702	rs765174	T	-0.09241	-0.119057	-0.0657629	491		4.24853e-08	2084.4	2087.16	2089.22	Causal	2.75739
14	RALGAPA1	-0.0418052	-0.0684754	-0.0151351	0.0243739	rs10220670	A	0.1478	0.105436	0.190164	491		5.84536e-08	1835.3	1838.05	1840.61	Causal	2.74475
22	APOBEC3A	0.0615849	0.0242655	0.0989043	0.0166903	rs12628403	C	-0.3945	-0.472633	-0.316367	491		2.22045e-16	1880	1882.74	1883.87	Causal	2.73632
15	PLEKHO2	0.0280451	0.0101627	0.0459274	0.0243314	rs832890	T	-0.1025	-0.122979	-0.0820213	491		1.11022e-16	1712.57	1709.84	1714.75	Colliding	2.72408
6	RPL10A	-0.0257704	-0.0429737	-0.00856705	0.0328022	rs2076172	C	0.1044	0.0849309	0.123869	491		1.58957e-18	1631.37	1634.09	1634.55	Causal	2.71651
10	IL15RA	0.0538746	0.0236638	0.0840854	0.00864054	rs3136621	G	0.162	0.123425	0.200575	491		2.58671e-11	2166.13	2163.43	2169.17	Colliding	2.70455
5	FAM153A	-0.144559	-0.233535	-0.0555831	0.0188386	rs3913373	C	0.4986	0.371488	0.625712	491		4.27583e-10	3050.69	3053.39	3056.06	Causal	2.69507
11	MYBPC3	0.061392	0.0208062	0.101978	0.0307658	rs3781627	T	-0.3282	-0.378027	-0.278373	490		1.30692e-26	2495.61	2498.3	2500.83	Causal	2.69374
1	PRDX6	0.0707044	0.0224133	0.118996	0.0376156	rs7556180	T	-0.316	-0.380495	-0.251505	491		8.88178e-16	2526.04	2523.35	2528.46	Colliding	2.68779
5	CPEB4	0.0363312	0.0107254	0.061937	0.0453845	rs2561758	A	0.1224	0.0885589	0.156241	491	rs2594836,rs791357	2.02962e-08	2015.78	2013.09	2017.43	Colliding	2.68504
6	SGK1	-0.0665345	-0.101993	-0.0310757	0.0053379	rs17827161	G	0.2942	0.215351	0.373049	491		4.69066e-09	1872.21	1869.56	1874.88	Colliding	2.65023
1	CR1L	0.160378	0.0756333	0.245122	0.00494991	rs11118218	G	-0.6185	-0.769916	-0.467084	491	rs11118220,rs12075041	9.45574e-11	2875.77	2878.42	2881.37	Causal	2.64886
10	PGAM1	0.0466994	0.0294798	0.063919	2.51787e-05	rs78685583	C	-0.1588	-0.20381	-0.11379	491		2.87348e-08	1085.87	1083.23	1087.24	Colliding	2.64417
17	RUNDC3A	0.114893	0.0362066	0.193579	0.0382324	rs10852959	G	-0.3592	-0.453408	-0.264992	488		6.81586e-10	3207.69	3205.05	3210.2	Colliding	2.63458
19	CLEC4G	0.107777	0.0373734	0.178181	0.0286056	rs4804778	A	-0.6912	-0.791476	-0.590924	491	rs4804780	5.92696e-28	2848.19	2850.81	2853.78	Causal	2.62048
2	ING5	-0.0364649	-0.0548253	-0.0181045	0.00300533	rs10047	T	0.06877	0.0467028	0.0908372	491		4.55872e-06	1810.44	1807.83	1813.55	Colliding	2.61518
9	GSN	0.0399194	0.0120614	0.0677773	0.0429424	rs10818520	A	-0.2068	-0.233912	-0.179688	491		2.7101e-33	2095.31	2092.7	2096.82	Colliding	2.60947
22	CCDC134	0.0608029	0.0184132	0.103193	0.0426978	rs4239895	G	-0.2448	-0.292446	-0.197154	491		1.11022e-16	2592.04	2589.44	2595.22	Colliding	2.60089
12	METTL7B	0.27912	0.140216	0.418024	0.00261228	rs7136793	T	0.5812	0.407366	0.755034	490		1.4835e-07	3819.57	3816.97	3820.76	Colliding	2.6007
3	ABHD14B	-0.0229791	-0.0392622	-0.00669604	0.0469443	rs323881	C	-0.1141	-0.149268	-0.0789322	491		2.78432e-07	1131.57	1134.16	1133.28	Causal	2.58982
18	TGIF1	-0.0446459	-0.0667107	-0.0225811	0.00242845	rs238135	C	-0.1349	-0.160226	-0.109574	491		2.38582e-18	1902.26	1904.84	1908.18	Causal	2.58467
12	C1RL	0.0328475	0.0128565	0.0528384	0.0172223	rs1075425	T	-0.1238	-0.153649	-0.0939509	491		2.76936e-11	1582.48	1579.91	1582.9	Colliding	2.56151
9	HIATL1	0.0475252	0.0186585	0.0763918	0.0169685	rs7863391	C	0.186	0.155417	0.216583	491		2.24328e-22	2191.36	2188.8	2193.11	Colliding	2.56135	0.872746	0.107138
17	TMC8	-0.0343796	-0.0549262	-0.013833	0.014983	rs57834781	T	-0.1198	-0.151487	-0.0881126	491		7.2701e-09	1574.84	1572.33	1577.03	Colliding	2.50882
19	PTGIR	0.0450487	0.0145093	0.0755881	0.0360368	rs75660000	C	-0.2047	-0.252536	-0.156864	491	rs80012672	1.46806e-11	2004.97	2007.47	2010.26	Causal	2.50031
10	PALD1	-0.107998	-0.179668	-0.0363283	0.0315105	rs4746040	A	-0.3346	-0.434616	-0.234584	491		1.06441e-06	2926.37	2923.88	2928.55	Colliding	2.4936
16	BAIAP3	-0.102304	-0.168425	-0.0361821	0.0266833	rs3759937	A	-0.6839	-0.802732	-0.565068	491		2.32297e-20	2535.53	2533.04	2537.63	Colliding	2.49331
4	MFSD7	0.071717	0.0395892	0.103845	0.000699379	rs28573204	G	0.2084	0.151185	0.265615	491		2.20376e-08	2036.03	2033.54	2038.51	Colliding	2.49278
7	AKR1B1	-0.0217267	-0.0351931	-0.00826028	0.01989	rs10239772	C	0.04984	0.0340155	0.0656645	491	rs17775910,rs1966139,rs56097712,rs58029288	1.66286e-06	1509.63	1507.15	1508.37	Colliding	2.48293
19	CPAMD8	-0.0862158	-0.138555	-0.0338768	0.0169201	rs12979956	G	-0.2821	-0.348933	-0.215267	490		2.77119e-11	2680.19	2677.73	2681.5	Colliding	2.4632
12	WSB2	0.0459952	0.0200793	0.071911	0.00908499	rs4128858	A	-0.1451	-0.173174	-0.117026	491		1.11022e-16	2119.75	2117.29	2120.96	Colliding	2.45765
15	GATM	-0.146056	-0.222567	-0.0695459	0.00451914	rs2467858	G	-0.6165	-0.702624	-0.530376	491		7.89023e-30	2946.17	2948.58	2951.73	Causal	2.41409
19	AC011484.1	0.257721	0.107638	0.407805	0.0121424	rs2288913	A	0.9518	0.777292	1.12631	491		3.3519e-18	3824.66	3827.05	3829.53	Causal	2.38963
15	TBC1D2B	0.0272951	0.0101511	0.0444391	0.0220499	rs4508395	T	-0.08232	-0.105836	-0.0588039	491		8.83291e-08	1536.39	1538.78	1541.7	Causal	2.38455
4	KLHL5	0.0481995	0.0223452	0.0740537	0.00573706	rs4833116	T	-0.1684	-0.19945	-0.13735	491		1.35654e-18	2019.58	2017.21	2022.8	Colliding	2.36445
22	PPM1F	-0.038387	-0.0636931	-0.0130809	0.0303166	rs12152192	C	-0.3304	-0.360646	-0.300154	491	rs17759934,rs199725385,rs2266973,rs2266978,rs2266980,rs4638895,rs56406117,rs62234964,rs62234965,rs62234966,rs62234971,rs62234972,rs743525,rs743526,rs762474,rs77955358,rs867117,rs9607424,rs9607460,rs9607461,rs9607473,rs9610704,rs9610728,rs9610729,rs9610731,rs9610750,rs9610796	3.67406e-59	1493.03	1490.71	1496.01	Colliding	2.31938
11	C11orf48	0.0329079	0.0111067	0.054709	0.0312	rs11231137	A	0.07978	0.0532773	0.106283	491		3.71291e-06	1899.35	1901.66	1901.24	Causal	2.31061
19	KLC3	0.212234	0.119022	0.305447	0.000517612	rs35605600	A	0.3471	0.23041	0.46379	491		1.36677e-05	3417.46	3419.77	3423.25	Causal	2.30597
11	FAM118B	0.0315119	0.0108731	0.0521508	0.029054	rs670712	A	0.1328	0.110667	0.154933	491		7.04778e-22	1858.96	1861.26	1860.63	Causal	2.29467
19	PRDX2	0.080937	0.047583	0.114291	0.000184343	rs897804	C	0.1385	0.100272	0.176728	491		7.2252e-09	2418.74	2416.45	2422.05	Colliding	2.29153
8	ZDHHC2	0.103926	0.0653618	0.14249	2.84845e-05	rs3808645	C	0.2726	0.213803	0.331397	491		1.92624e-13	2202.09	2199.8	2205.5	Colliding	2.29074
12	ASB8	0.0202951	0.00710625	0.033484	0.0275741	rs11168383	A	0.06129	0.0406285	0.0819515	485		8.98521e-06	1154.77	1152.53	1157.26	Colliding	2.24086
22	PPM1F	-0.038387	-0.0636931	-0.0130809	0.0303166	rs5756324	C	-0.2346	-0.260622	-0.208578	491		3.03559e-44	1835.83	1838.04	1840.2	Causal	2.20999
1	NCSTN	0.0267407	0.0105047	0.0429768	0.0169323	rs10908774	A	-0.1076	-0.124364	-0.0908359	491	rs11265373,rs1886421,rs2147471,rs6669995	8.76456e-26	1613.97	1611.77	1617.38	Colliding	2.19856
9	WNK2	-0.143931	-0.241612	-0.046251	0.0362105	rs2398820	G	-0.3689	-0.493646	-0.244154	491		2.08675e-05	3442.36	3440.16	3445.73	Colliding	2.19729
14	LGALS3	0.0932237	0.0450133	0.141434	0.00403842	rs56660630	G	-0.185	-0.240921	-0.129079	491		1.73469e-07	2780.24	2778.04	2783.22	Colliding	2.19538
7	GPR146	0.145815	0.0725304	0.2191	0.00293961	rs10265736	T	0.3485	0.23669	0.46031	491	rs10265758	4.67946e-06	2889.69	2887.49	2892.22	Colliding	2.1935
19	ZNF90	-0.109334	-0.181402	-0.0372671	0.0303015	rs11666022	C	0.3727	0.261567	0.483833	491		3.19867e-07	2862.35	2860.19	2865.59	Colliding	2.16184
11	UCP2	0.0359666	0.0132355	0.0586976	0.0230699	rs72982975	A	0.1866	0.161342	0.211858	491		4.84651e-32	1766	1763.85	1769.59	Colliding	2.14428
19	ZNF90	-0.109334	-0.181402	-0.0372671	0.0303015	rs61998186	G	-0.4321	-0.557585	-0.306615	491		1.2957e-07	2762.75	2760.6	2763.96	Colliding	2.14056
4	DAPP1	0.0637903	0.0396815	0.087899	4.09297e-05	rs11935398	T	-0.1067	-0.136812	-0.076588	491	rs11935399	2.60797e-08	2038.48	2036.36	2042.05	Colliding	2.12089
19	ZNF554	-0.0543202	-0.0893017	-0.0193387	0.0261024	rs2537856	A	0.2219	0.182683	0.261117	491		2.90296e-20	2322.41	2324.52	2328.28	Causal	2.1088
3	SCAP	-0.0472438	-0.0638083	-0.0306794	8.34183e-06	rs4858894	C	-0.06729	-0.0880824	-0.0464976	481		1.40186e-07	1655.17	1657.26	1659.48	Causal	2.0949
22	TMEM184B	-0.0415371	-0.0597718	-0.0233025	0.000515117	rs6001074	T	0.06323	0.0427426	0.0837174	491		3.60777e-06	1845.38	1847.47	1847.61	Causal	2.09467
11	TRIM5	0.0544762	0.0255161	0.0834363	0.00523919	rs12271225	T	-0.1772	-0.231816	-0.122584	491		2.10568e-06	1805.2	1807.29	1808.05	Causal	2.08955
6	TAP2	0.0535121	0.021982	0.0850422	0.0133866	rs4148876	A	-0.341	-0.412619	-0.269381	491		2.10165e-13	1691.04	1693.12	1696.11	Causal	2.07367
7	GPR141	0.0580737	0.0220696	0.0940778	0.0199098	rs2597268	T	0.1685	0.123525	0.213475	491	rs2717926,rs2718081	4.98609e-09	2534.19	2532.12	2537.63	Colliding	2.06627
18	RBBP8	0.0423976	0.0142315	0.0705638	0.0317018	rs7232963	T	-0.1355	-0.174372	-0.0966278	491		4.55182e-08	2065.23	2067.29	2069.08	Causal	2.06563
11	SERPINH1	-0.0585169	-0.0860693	-0.0309644	0.00135828	rs694844	A	-0.1257	-0.157084	-0.0943156	491		1.63557e-10	2214.21	2216.27	2219.94	Causal	2.05789
18	ME2	0.0323795	0.0159482	0.0488109	0.00329912	rs2849243	T	0.0662	0.0469121	0.0854879	491		8.19022e-08	1702.7	1704.75	1708.17	Causal	2.05706
19	EIF3G	-0.0183315	-0.0311301	-0.00553284	0.0430267	rs12460842	A	-0.06901	-0.0824818	-0.0555382	491		2.22045e-16	1433.35	1435.4	1437.27	Causal	2.04772
21	COL18A1	0.109447	0.0328315	0.186062	0.0436906	21:46921118:A:T	A	-0.612	-0.689839	-0.534161	491		3.96365e-35	3039.73	3041.77	3045.66	Causal	2.03985
4	DDX60L	0.109979	0.0662587	0.1537	0.000102814	rs72693183	C	-0.2953	-0.372051	-0.218549	491		1.84767e-09	2239.13	2241.17	2243.83	Causal	2.03185
13	DHRS12	0.0755575	0.0367078	0.114407	0.00381693	rs9535784	A	0.2391	0.17993	0.29827	489		6.6418e-11	2232.99	2235.01	2238.93	Causal	2.02286
19	INSL3	0.0867177	0.0312443	0.142191	0.0249446	rs3761050	T	0.3144	0.214511	0.414289	491		2.88522e-06	2528.58	2526.57	2528.98	Colliding	2.00995
10	FAM107B	0.0227469	0.00703932	0.0384544	0.0401216	rs17155703	C	0.09219	0.0712575	0.113122	491		3.84881e-12	1441.69	1443.7	1445.15	Causal	2.0069
